# Supplementary material
Source: PubMed Central journal article supplement (PMC2656663)

**Supplemental Fig. 1.** Concentrations (nmol/g) of 3,4-didehydroretinol, 3,4-didehydroretinyl esters, retinol, and retinyl esters in liver (A) and kidney (B) in rats fed 6% (solid; except for retinyl ester = narrow downward diagonal) versus 21% fat (wide upward diagonal) 4, 5, and 7 days following a one time oral 700 nmol 3,4-didehydroretinyl acetate dose at the beginning of week 10. These rats were dosed daily with 70 nmol retinyl acetate. Different lower case letters indicate a significant difference between 6 and 21% dietary fat group by compound by LSD ( $P < 0.05$ ). n = 4 per day per dietary fat group except for day 5, 21% dietary fat n = 3. Values are means.

FIGURE S1

A

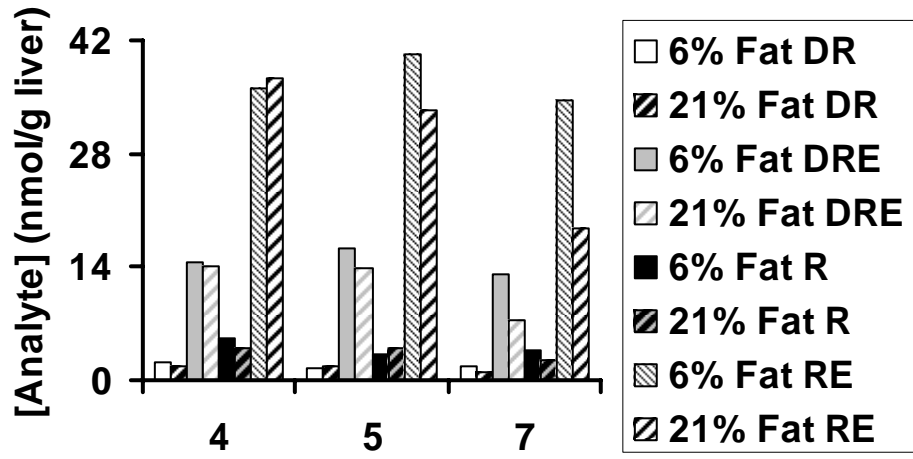

B

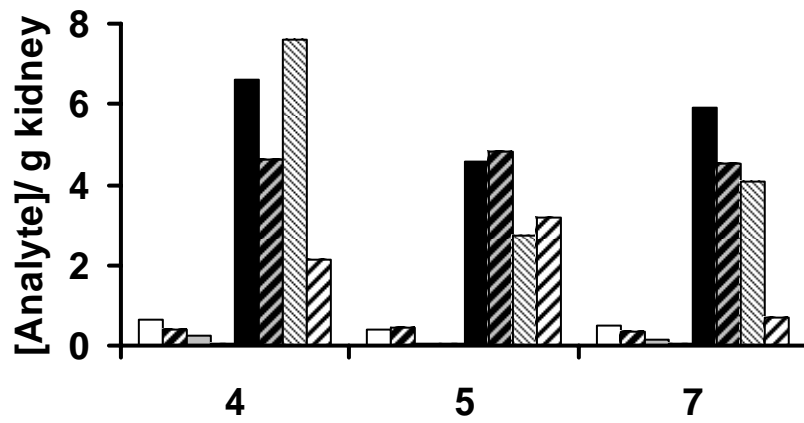

Supplement: supp_M800479-JLR200_Suppdata.pdf [file supp_M800479-JLR200_Suppdata.pdf]
